# Supplementary material for: Identification of Time-Varying Conceptual Hydrological Model Parameters with Differentiable Parameter Learning
Source: MDPI journal article supplement (doi:10.3390/w16060896), 2024-03-20
Supplement: s1 [file s1]

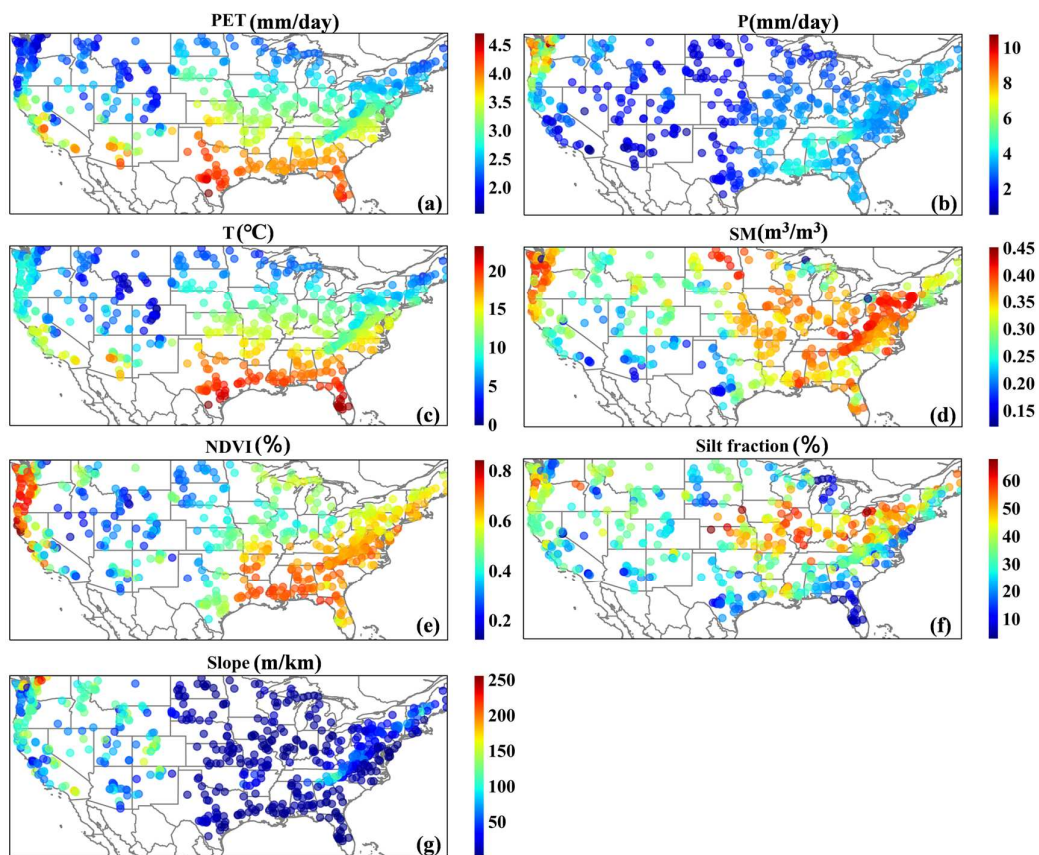

**Figure S1.** The spatial variation characteristics of PET (a), P (b), T (c), SM (d), NDVI (e) and silt fraction (f) and slope (g).

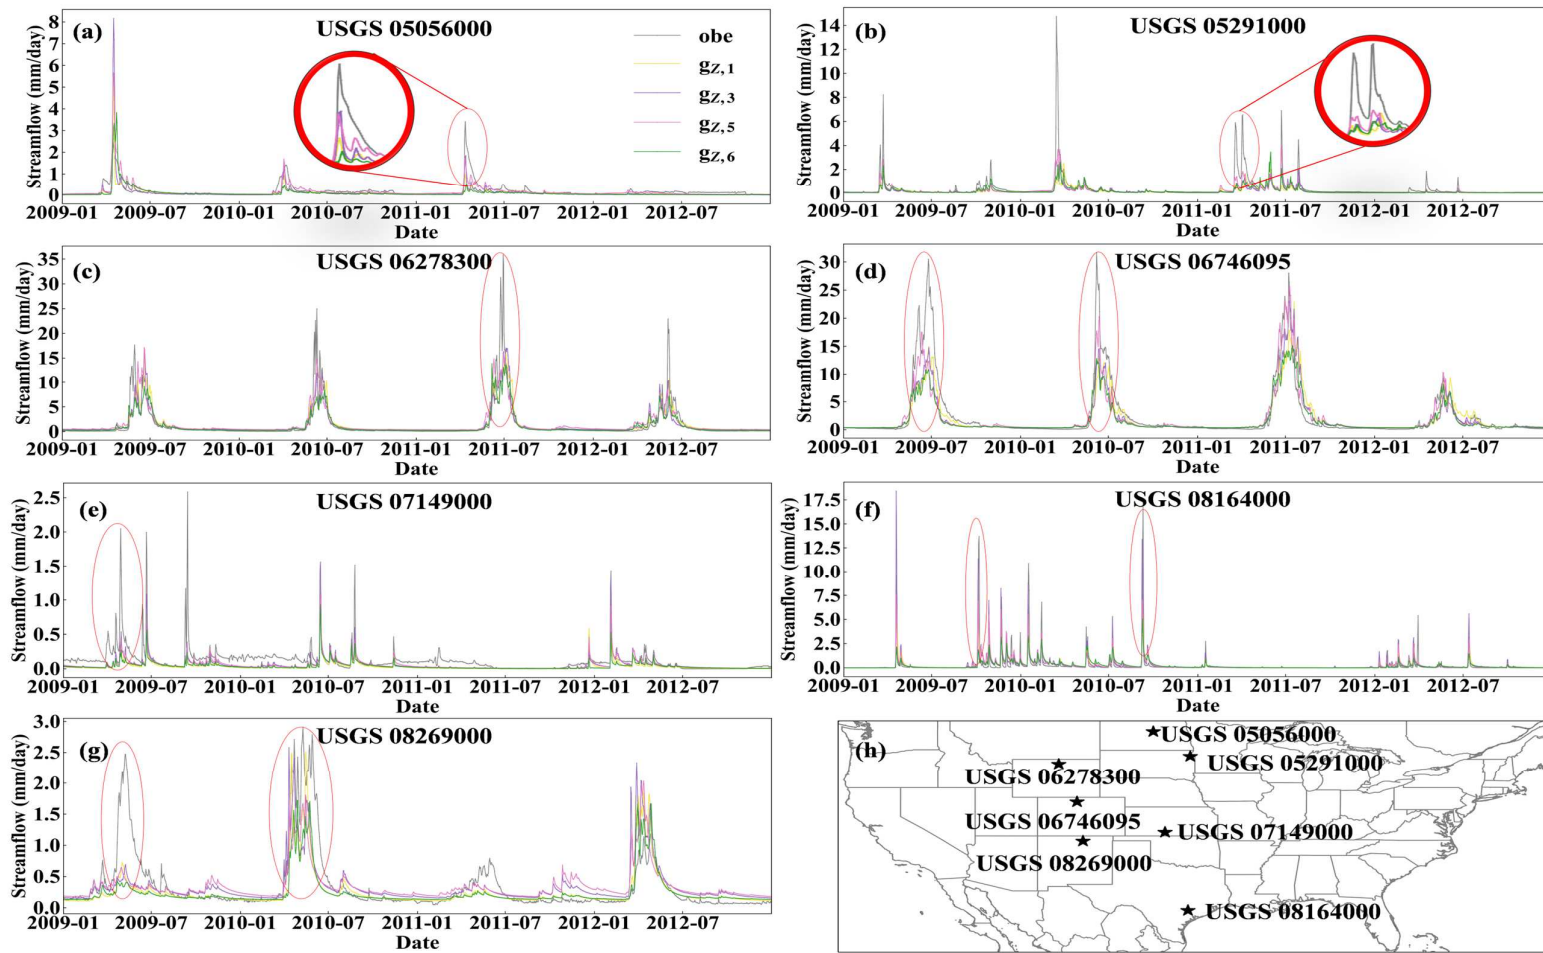

.Figure S2. Streamflow estimation accuracy for  $g_{z,1}$ ,  $g_{z,3}$ ,  $g_{z,5}$  and  $g_{z,6}$  at selected stations (a-g) in arid catchments. (h) The locations of these selected stations.

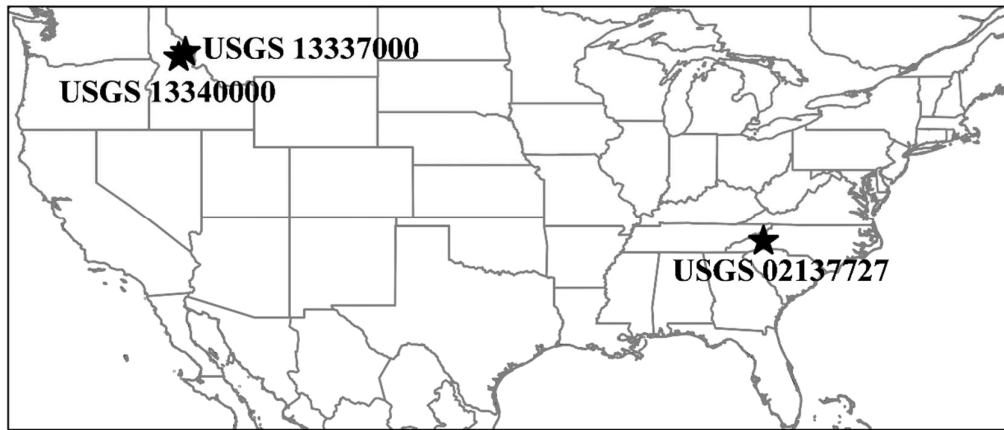

**Figure S3.** Location of catchments.

**Table S1.** The catchment attribute data.

| Type       | Variables            | Definition                                                                                  |
|------------|----------------------|---------------------------------------------------------------------------------------------|
| Climate    | p_mean               | Average daily rainfall (mm/day)                                                             |
|            | pet_mean             | Average daily potential evapotranspiration (mm/day)                                         |
|            | p_seasonality        | The seasonality and timing of precipitation distribution                                    |
|            | frac_snow            | The fraction of rainfall falling as snow                                                    |
|            | Aridity              | The ratio of mean potential evapotranspiration to mean rainfall                             |
|            | high_prec_freq       | The frequency of days with high precipitation (days/year)                                   |
|            | high_prec_dur        | Mean duration of high precipitation events (days)                                           |
|            | low_prec_freq        | The frequency of days with low precipitation (days/year)                                    |
| Topography | low_prec_dur         | Mean duration of periods with low precipitation (days)                                      |
|            | elev_mean            | The mean elevation of the catchment (m)                                                     |
|            | slope_mean           | The mean slope of the catchment (m/km)                                                      |
| Landuse    | area_gages2          | Catchment area (km <sup>2</sup> )                                                           |
|            | forest_frac          | Fraction of forest cover                                                                    |
|            | lai_max              | Maximum monthly average of the leaf area index                                              |
|            | lai_diff             | Difference between the maximum and minimum monthly average of the leaf area index           |
|            | gvf_max              | Maximum monthly average of the green vegetation                                             |
|            | gvf_diff             | Difference between the maximum and minimum monthly average of the green vegetation fraction |
|            | dom_land_cover       | The dominant land use type                                                                  |
|            | dom_land_cover_frac  | Fraction of the catchment area occupied by the dominant land cover                          |
| Soil       | root_depth_xx        | Root depth (m)                                                                              |
|            | soil_depth_pelletier | Depth to bedrock (m)                                                                        |
|            | soil_depth_statsgo   | Soil depth (m)                                                                              |

|         |                      |                                                                                            |
|---------|----------------------|--------------------------------------------------------------------------------------------|
|         | soil_porosity        | Volumetric porosity                                                                        |
|         | soil_conductivity    | Saturated hydraulic conductivity (cm/hr)                                                   |
|         | max_water_content    | Maximum water content (m)                                                                  |
|         | sand_frac            | Sand fraction (%)                                                                          |
|         | silt_frac            | Silt fraction (%)                                                                          |
|         | clay_frac            | Clay fraction (%)                                                                          |
| Geology | geol_1st_class       | The most common geologic classification                                                    |
|         | glim_1st_class_frac  | Fraction of the catchment area characterized by the most common geologic class             |
|         | geol_2nd_class       | The secondary geological classification                                                    |
|         | glim_2nd_class_frac  | Fraction of the catchment area characterized by the second most prevalent geological class |
|         | carbonate_rocks_frac | Fraction of the catchment area covered by carbonate sedimentary rocks                      |
|         | geol_porosity        | Subsurface porosity                                                                        |
|         | geol_permeability    | Subsurface permeability (m <sup>2</sup> )                                                  |
